# Supplementary material for: Effect of Brønsted Acid on the Reactivity and Selectivity of the Oxoiron(V) Intermediates in C-H and C=C Oxidation Reactions
Source: MDPI journal article supplement (doi:10.3390/catal12090949), 2022-08-26
Supplement: s1 [file s1]

## Electronic Supplementary Information

### **Effect of Brønsted acid on the reactivity and selectivity of the oxoiron(V) intermediates in C-H and C=C oxidation reactions**

Alexandra M. Zima, Oleg Y. Lyakin, Anna A. Bryliakova, Dmitrii E. Babushkin, Konstantin P.  
Bryliakov, Evgenii P. Talsi\*

Boreskov Institute of Catalysis, Pr. Lavrentieva 5, Novosibirsk 630090, Russian Federation

\* Corresponding author, e-mail: [talsi@catalysis.ru](mailto:talsi@catalysis.ru)

#### **Table of Contents**

|                                                            |     |
|------------------------------------------------------------|-----|
| <b>Computational details</b> .....                         | S2  |
| <b>Cartesian coordinates and calculated energies</b> ..... | S3  |
| <b>Figure S1</b> .....                                     | S16 |
| <b>Figure S2</b> .....                                     | S17 |
| <b>KIE measurements &amp; Table S1</b> .....               | S18 |
| <b>Supplementary references</b> .....                      | S19 |

**DFT calculations: Computational details.**

Geometry optimization and frequency analysis of the  $[(L)Fe(O)(OAc)]^{2+}$ ,  $[^HLFe^V=O(OAc)]^{3+}$ ,  $[LFe^{IV}-OH(OAc)]^{3+}$  intermediates with different multiplicities, as well as HOAc,  $OAc^-$ ,  $HClO_4$ ,  $HClO^-$ , were carried with the B3LYP density functional theory scheme (DFT) with D3 corrections<sup>[S1]</sup> using GAUSSIAN 16 program suite,<sup>[S2]</sup> with the def2-TZVPP<sup>[S3]</sup> basis set for the Fe atom and 6-311G(d)<sup>[S4]</sup> basis set for other atoms. Solvation effects (with  $CH_3CN$ ) were incorporated using polarized continuum model (PCM) method<sup>[S5,S6]</sup> as implemented in GAUSSIAN 16. The stationary points were ascertained by vibrational frequency analysis with no imaginary frequencies. Bond orders, spin densities and partial charges were computed using DDEC6 atomic population analysis.<sup>[S7,S8]</sup> The Gibbs energies reported in this paper were sum of electronic and thermal free energies.

DFT optimized Cartesian coordinates and potential energies (Ha) for the calculated structures are presented below.

**$^2[(^{\text{NMe}_2}\text{PDP})\text{Fe}^{\text{V}}=\text{O}(\text{OAc})]^{2+}$  in acetonitrile**

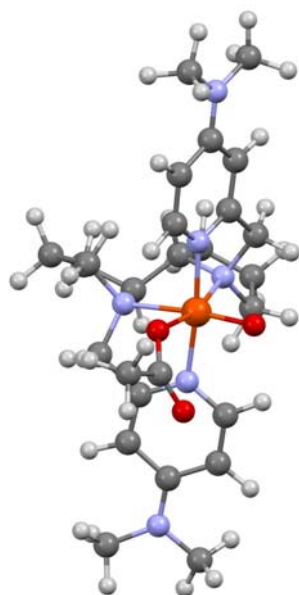

**Energy = -2832.3942475 Ha, G = -2831.816240 Ha**

|    |           |           |           |
|----|-----------|-----------|-----------|
| 26 | -0.071184 | 0.433980  | -0.514122 |
| 7  | -2.029092 | 0.549709  | -0.321756 |
| 6  | -2.725998 | 1.541908  | 0.266726  |
| 6  | -4.098314 | 1.556571  | 0.319393  |
| 6  | -4.847100 | 0.496531  | -0.263593 |
| 6  | -4.087821 | -0.532073 | -0.887209 |
| 6  | -2.715431 | -0.458401 | -0.904550 |
| 6  | -1.843592 | -1.461532 | -1.600387 |
| 6  | -6.940484 | 1.538112  | 0.431947  |
| 7  | -6.196072 | 0.464845  | -0.225476 |
| 7  | 1.924617  | 0.252732  | -0.506787 |
| 6  | 2.673612  | 0.253141  | -1.628473 |
| 6  | 4.042030  | 0.165441  | -1.600280 |
| 6  | 4.701591  | 0.109800  | -0.342303 |
| 6  | 3.895487  | 0.118307  | 0.826816  |
| 6  | 2.523604  | 0.187564  | 0.700230  |
| 6  | 1.592840  | 0.234039  | 1.878037  |
| 6  | 6.886267  | -0.195501 | -1.440911 |
| 7  | -0.530173 | -1.534566 | -0.888321 |
| 6  | 0.450418  | -2.343300 | -1.677826 |
| 6  | 0.053884  | -3.800627 | -1.429124 |
| 6  | -0.487718 | -3.803074 | 0.022953  |
| 6  | -0.691094 | -2.311644 | 0.398324  |
| 7  | 0.269908  | -0.313185 | 1.482823  |
| 6  | -0.749040 | -0.032175 | 2.540320  |
| 6  | -0.493394 | -1.076411 | 3.632492  |
| 6  | 0.016763  | -2.319092 | 2.859136  |
| 6  | 0.325995  | -1.815769 | 1.423969  |
| 7  | 6.055565  | 0.047424  | -0.259426 |
| 8  | -0.097526 | 0.811854  | -2.100583 |
| 8  | 0.058745  | 2.189204  | 0.253061  |
| 6  | 0.934657  | 3.108315  | -0.039898 |
| 6  | 0.649843  | 4.433886  | 0.646740  |
| 8  | 1.901487  | 2.963321  | -0.781148 |
| 6  | -6.926641 | -0.640904 | -0.842849 |
| 6  | 6.766044  | 0.224685  | 1.008758  |
| 1  | -2.128886 | 2.330592  | 0.701700  |
| 1  | -4.580577 | 2.386736  | 0.813939  |
| 1  | -4.564381 | -1.379878 | -1.357491 |
| 1  | -2.322565 | -2.440007 | -1.658955 |

|   |           |           |           |
|---|-----------|-----------|-----------|
| 1 | -1.638930 | -1.111785 | -2.612740 |
| 1 | -8.004195 | 1.329321  | 0.362386  |
| 1 | -6.751071 | 2.503315  | -0.045926 |
| 1 | -6.676922 | 1.612619  | 1.490682  |
| 1 | 2.119767  | 0.338723  | -2.551930 |
| 1 | 4.584836  | 0.188661  | -2.532895 |
| 1 | 4.325329  | 0.034833  | 1.813920  |
| 1 | 2.019735  | -0.293334 | 2.733891  |
| 1 | 1.449594  | 1.276199  | 2.164849  |
| 1 | 7.847399  | -0.581494 | -1.113476 |
| 1 | 6.416110  | -0.919042 | -2.101613 |
| 1 | 7.044468  | 0.746658  | -1.973874 |
| 1 | 1.444100  | -2.146941 | -1.280129 |
| 1 | 0.434699  | -2.025296 | -2.717863 |
| 1 | -0.714663 | -4.119753 | -2.135016 |
| 1 | 0.906959  | -4.467032 | -1.556603 |
| 1 | 0.219840  | -4.270206 | 0.709912  |
| 1 | -1.421680 | -4.358264 | 0.102614  |
| 1 | -1.695863 | -2.122407 | 0.774795  |
| 1 | -1.733425 | -0.169351 | 2.098372  |
| 1 | -0.670900 | 1.004555  | 2.861021  |
| 1 | 0.257557  | -0.721647 | 4.340683  |
| 1 | -1.400743 | -1.282982 | 4.200296  |
| 1 | -0.735801 | -3.108732 | 2.829495  |
| 1 | 0.905121  | -2.745648 | 3.323993  |
| 1 | 1.325942  | -2.106309 | 1.100714  |
| 1 | 1.458899  | 5.139554  | 0.466782  |
| 1 | -0.286042 | 4.844838  | 0.260328  |
| 1 | 0.521267  | 4.277696  | 1.719622  |
| 1 | -6.722433 | -0.701713 | -1.915540 |
| 1 | -7.993082 | -0.482465 | -0.710694 |
| 1 | -6.665015 | -1.596986 | -0.380562 |
| 1 | 7.772144  | 0.574726  | 0.793922  |
| 1 | 6.829102  | -0.737073 | 1.526532  |
| 1 | 6.263579  | 0.953867  | 1.637637  |

**$4[(^{\text{NMe}_2}\text{PDP})\text{Fe}^{\text{V}}=\text{O}(\text{OAc})]^{2+}$  in acetonitrile**

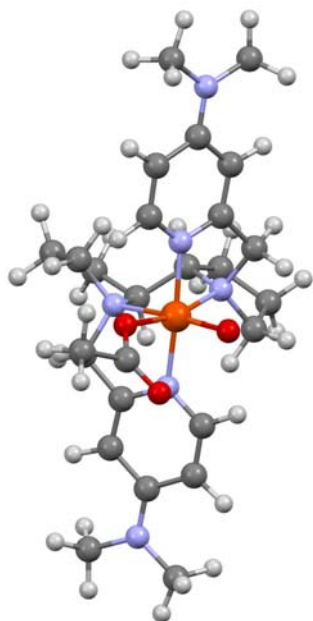

**Energy = -2832.4002975 Ha, Energy+ZPE = -2831.821194 Ha**

|    |           |           |           |
|----|-----------|-----------|-----------|
| 26 | -0.018366 | 0.476636  | -0.418551 |
| 7  | -2.000273 | 0.514561  | -0.234386 |
| 6  | -2.715477 | 1.436711  | 0.443643  |
| 6  | -4.085852 | 1.429689  | 0.473269  |
| 6  | -4.813748 | 0.424942  | -0.226878 |
| 6  | -4.031670 | -0.528813 | -0.939606 |
| 6  | -2.663404 | -0.438407 | -0.931550 |
| 6  | -1.763764 | -1.356337 | -1.700000 |
| 6  | -6.927309 | 1.367117  | 0.539464  |
| 7  | -6.158019 | 0.375182  | -0.213991 |
| 7  | 1.906538  | 0.321585  | -0.449043 |
| 6  | 2.666874  | 0.465197  | -1.564990 |
| 6  | 4.030001  | 0.397302  | -1.540195 |
| 6  | 4.714514  | 0.184173  | -0.305805 |
| 6  | 3.893815  | 0.071735  | 0.855628  |
| 6  | 2.532483  | 0.157733  | 0.749119  |
| 6  | 1.609246  | 0.127879  | 1.928886  |
| 6  | 6.865073  | 0.207726  | -1.452874 |
| 7  | -0.461974 | -1.465399 | -0.967562 |
| 6  | 0.556672  | -2.183478 | -1.804806 |
| 6  | 0.183874  | -3.661999 | -1.676452 |
| 6  | -0.384211 | -3.793360 | -0.239910 |
| 6  | -0.622206 | -2.344316 | 0.255325  |
| 7  | 0.292821  | -0.413262 | 1.490207  |
| 6  | -0.734949 | -0.230191 | 2.564000  |
| 6  | -0.450324 | -1.344642 | 3.575429  |
| 6  | 0.073991  | -2.519761 | 2.711837  |
| 6  | 0.379951  | -1.909152 | 1.319628  |
| 7  | 6.050548  | 0.094783  | -0.238848 |
| 8  | -0.083599 | 0.960623  | -1.983970 |
| 8  | 0.065686  | 2.109693  | 0.435846  |
| 6  | 0.651309  | 3.214428  | -0.043860 |
| 6  | 0.376881  | 4.401729  | 0.853608  |
| 8  | 1.320393  | 3.259137  | -1.051007 |
| 6  | -6.868302 | -0.668677 | -0.954785 |
| 6  | 6.721133  | -0.111335 | 1.048685  |
| 1  | -2.139725 | 2.184538  | 0.969152  |
| 1  | -4.584560 | 2.202031  | 1.039361  |
| 1  | -4.489528 | -1.332978 | -1.496356 |

|   |           |           |           |
|---|-----------|-----------|-----------|
| 1 | -2.211884 | -2.339166 | -1.847473 |
| 1 | -1.551755 | -0.923191 | -2.678104 |
| 1 | -7.986245 | 1.150366  | 0.435045  |
| 1 | -6.746081 | 2.376854  | 0.162004  |
| 1 | -6.676195 | 1.336255  | 1.602845  |
| 1 | 2.124228  | 0.631675  | -2.483796 |
| 1 | 4.561668  | 0.513984  | -2.472536 |
| 1 | 4.322070  | -0.075851 | 1.835777  |
| 1 | 2.030894  | -0.450016 | 2.752375  |
| 1 | 1.444768  | 1.148037  | 2.276515  |
| 1 | 7.910599  | 0.077440  | -1.192316 |
| 1 | 6.593384  | -0.563568 | -2.176759 |
| 1 | 6.744436  | 1.190552  | -1.914250 |
| 1 | 1.535837  | -1.993401 | -1.373004 |
| 1 | 0.546166  | -1.783678 | -2.815990 |
| 1 | -0.562475 | -3.940250 | -2.421654 |
| 1 | 1.055655  | -4.295311 | -1.837890 |
| 1 | 0.318964  | -4.302781 | 0.420277  |
| 1 | -1.309759 | -4.367004 | -0.224718 |
| 1 | -1.633749 | -2.201595 | 0.632989  |
| 1 | -1.716316 | -0.361800 | 2.115364  |
| 1 | -0.677252 | 0.781771  | 2.958625  |
| 1 | 0.299565  | -1.027923 | 4.301929  |
| 1 | -1.350279 | -1.606399 | 4.131531  |
| 1 | -0.670615 | -3.311990 | 2.620886  |
| 1 | 0.966628  | -2.970402 | 3.143717  |
| 1 | 1.387604  | -2.152132 | 0.982457  |
| 1 | 0.959205  | 5.258299  | 0.519605  |
| 1 | -0.687524 | 4.645936  | 0.816739  |
| 1 | 0.622942  | 4.159376  | 1.888694  |
| 1 | -6.641264 | -0.618738 | -2.022858 |
| 1 | -7.937858 | -0.529030 | -0.829510 |
| 1 | -6.608299 | -1.663421 | -0.583077 |
| 1 | 7.793974  | -0.148421 | 0.888381  |
| 1 | 6.408905  | -1.053523 | 1.504939  |
| 1 | 6.505710  | 0.708777  | 1.737212  |

**$^2[(^{\text{H}}\text{NMe}_2\text{PDP})\text{Fe}^{\text{V}}=\text{O}(\text{OAc})]^{3+}$  in acetonitrile**

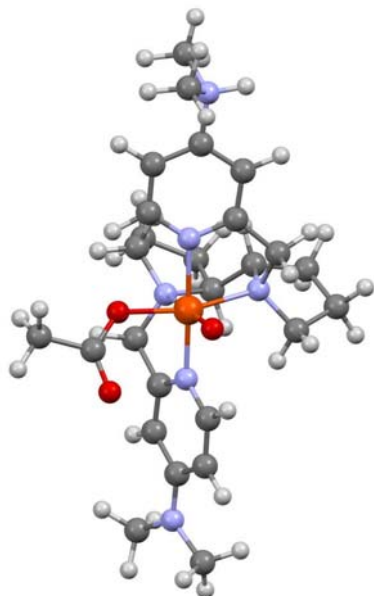

**Energy = -2832.8081011 Ha, G = -2832.213939 Ha**

|    |           |           |           |
|----|-----------|-----------|-----------|
| 26 | -0.089065 | 0.329618  | -0.491711 |
| 7  | -2.081926 | 0.355496  | -0.327280 |
| 6  | -2.804233 | 1.328100  | 0.244174  |
| 6  | -4.189823 | 1.311246  | 0.229109  |
| 6  | -4.815220 | 0.248891  | -0.408550 |
| 6  | -4.075233 | -0.763261 | -0.998466 |
| 6  | -2.689582 | -0.671313 | -0.944092 |
| 6  | -1.765607 | -1.655731 | -1.595653 |
| 6  | -6.898752 | -0.033728 | 0.909670  |
| 7  | -6.292180 | 0.183106  | -0.460747 |
| 7  | 1.894747  | 0.254352  | -0.513224 |
| 6  | 2.628320  | 0.304218  | -1.643245 |
| 6  | 4.000461  | 0.276043  | -1.629356 |
| 6  | 4.673826  | 0.224908  | -0.379725 |
| 6  | 3.883158  | 0.188449  | 0.797856  |
| 6  | 2.507728  | 0.204263  | 0.687549  |
| 6  | 1.589035  | 0.208555  | 1.874728  |
| 6  | 6.863489  | 0.020952  | -1.499466 |
| 7  | -0.460701 | -1.660246 | -0.869392 |
| 6  | 0.565075  | -2.428884 | -1.646032 |
| 6  | 0.234714  | -3.901402 | -1.390999 |
| 6  | -0.331793 | -3.921847 | 0.051852  |
| 6  | -0.594623 | -2.439099 | 0.421295  |
| 7  | 0.285539  | -0.396159 | 1.491816  |
| 6  | -0.734842 | -0.147811 | 2.558044  |
| 6  | -0.427839 | -1.174538 | 3.652852  |
| 6  | 0.116978  | -2.403246 | 2.881462  |
| 6  | 0.402817  | -1.896888 | 1.442763  |
| 7  | 6.032264  | 0.210571  | -0.309575 |
| 8  | -0.170574 | 0.708647  | -2.077501 |
| 8  | -0.063826 | 2.077572  | 0.278001  |
| 6  | 0.740283  | 3.061675  | -0.036048 |
| 6  | 0.362956  | 4.361980  | 0.651560  |
| 8  | 1.698422  | 2.980030  | -0.792972 |
| 6  | -6.894949 | 1.376902  | -1.171391 |
| 6  | 6.742635  | 0.392938  | 0.958195  |
| 1  | -2.237519 | 2.123244  | 0.706437  |
| 1  | -4.733061 | 2.114937  | 0.705607  |
| 1  | -4.542518 | -1.605717 | -1.493244 |
| 1  | -2.211477 | -2.650642 | -1.636257 |

|   |           |           |           |
|---|-----------|-----------|-----------|
| 1 | -1.573491 | -1.321082 | -2.616120 |
| 1 | -7.968923 | -0.173985 | 0.783120  |
| 1 | -6.700699 | 0.841591  | 1.521008  |
| 1 | -6.444610 | -0.918185 | 1.348087  |
| 1 | 2.063637  | 0.377193  | -2.560870 |
| 1 | 4.530412  | 0.338622  | -2.567480 |
| 1 | 4.326244  | 0.113715  | 1.779566  |
| 1 | 2.045404  | -0.300303 | 2.725840  |
| 1 | 1.403674  | 1.243465  | 2.163473  |
| 1 | 7.826961  | -0.372546 | -1.187449 |
| 1 | 6.398683  | -0.674164 | -2.192640 |
| 1 | 7.016710  | 0.988179  | -1.987686 |
| 1 | 1.543008  | -2.181893 | -1.238627 |
| 1 | 0.545818  | -2.118451 | -2.688246 |
| 1 | -0.503571 | -4.263915 | -2.107805 |
| 1 | 1.122005  | -4.524949 | -1.498162 |
| 1 | 0.378479  | -4.362577 | 0.752799  |
| 1 | -1.246850 | -4.509326 | 0.115554  |
| 1 | -1.606158 | -2.288960 | 0.797606  |
| 1 | -1.718685 | -0.328141 | 2.129752  |
| 1 | -0.693710 | 0.892887  | 2.871730  |
| 1 | 0.318423  | -0.786933 | 4.348300  |
| 1 | -1.319703 | -1.409382 | 4.233709  |
| 1 | -0.611263 | -3.215469 | 2.858836  |
| 1 | 1.020233  | -2.800844 | 3.342927  |
| 1 | 1.413046  | -2.148169 | 1.119392  |
| 1 | 1.116907  | 5.124104  | 0.463216  |
| 1 | -0.603107 | 4.702705  | 0.270749  |
| 1 | 0.253510  | 4.200507  | 1.725680  |
| 1 | -6.723927 | 2.267680  | -0.574335 |
| 1 | -7.960756 | 1.195721  | -1.279137 |
| 1 | -6.420471 | 1.469072  | -2.144653 |
| 1 | 7.750957  | 0.734933  | 0.743434  |
| 1 | 6.797379  | -0.566447 | 1.481618  |
| 1 | 6.240564  | 1.128185  | 1.581034  |
| 1 | -6.537029 | -0.636117 | -1.020264 |



**$4[(^{\text{H}}\text{NMe}_2\text{PDP})\text{Fe}^{\text{V}}=\text{O}(\text{OAc})]^{3+}$  in acetonitrile**

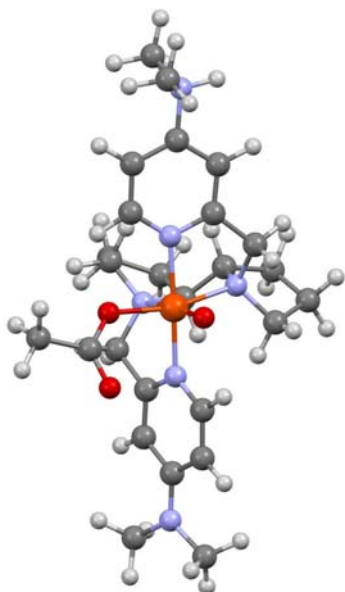

**Energy = -2832.8100346 Ha, G = -2832.216003 Ha**

|    |           |           |           |
|----|-----------|-----------|-----------|
| 26 | -0.073101 | 0.332753  | -0.478103 |
| 7  | -2.074529 | 0.352139  | -0.313205 |
| 6  | -2.799879 | 1.321528  | 0.259862  |
| 6  | -4.185335 | 1.305653  | 0.236331  |
| 6  | -4.807529 | 0.248184  | -0.412519 |
| 6  | -4.064372 | -0.760983 | -1.003530 |
| 6  | -2.679179 | -0.670645 | -0.939514 |
| 6  | -1.752661 | -1.652404 | -1.590500 |
| 6  | -6.905659 | -0.032460 | 0.884867  |
| 7  | -6.283865 | 0.184927  | -0.478648 |
| 7  | 1.879194  | 0.258757  | -0.509042 |
| 6  | 2.612284  | 0.310404  | -1.644354 |
| 6  | 3.981116  | 0.275587  | -1.636876 |
| 6  | 4.667076  | 0.218629  | -0.391130 |
| 6  | 3.877422  | 0.182056  | 0.791107  |
| 6  | 2.505686  | 0.204886  | 0.690696  |
| 6  | 1.593572  | 0.212496  | 1.882203  |
| 6  | 6.843165  | 0.030346  | -1.529126 |
| 7  | -0.450207 | -1.657306 | -0.859650 |
| 6  | 0.577879  | -2.426884 | -1.633711 |
| 6  | 0.244697  | -3.898679 | -1.379291 |
| 6  | -0.324827 | -3.918730 | 0.062351  |
| 6  | -0.588318 | -2.436186 | 0.431388  |
| 7  | 0.289242  | -0.392682 | 1.502783  |
| 6  | -0.730497 | -0.142487 | 2.569424  |
| 6  | -0.421646 | -1.167879 | 3.664643  |
| 6  | 0.117015  | -2.399062 | 2.893164  |
| 6  | 0.406502  | -1.893931 | 1.454856  |
| 7  | 6.018634  | 0.199878  | -0.329686 |
| 8  | -0.166355 | 0.713549  | -2.063196 |
| 8  | -0.070324 | 2.073763  | 0.282268  |
| 6  | 0.734453  | 3.066478  | -0.019308 |
| 6  | 0.335569  | 4.359429  | 0.667248  |
| 8  | 1.702619  | 2.988703  | -0.760641 |
| 6  | -6.877377 | 1.380682  | -1.193986 |
| 6  | 6.737395  | 0.358376  | 0.938239  |
| 1  | -2.236568 | 2.114541  | 0.729693  |
| 1  | -4.730509 | 2.107268  | 0.714135  |
| 1  | -4.528960 | -1.599938 | -1.506729 |
| 1  | -2.196660 | -2.647943 | -1.633298 |

|   |           |           |           |
|---|-----------|-----------|-----------|
| 1 | -1.558083 | -1.317075 | -2.610263 |
| 1 | -7.974172 | -0.173138 | 0.745747  |
| 1 | -6.715553 | 0.843044  | 1.498346  |
| 1 | -6.456358 | -0.916850 | 1.328349  |
| 1 | 2.045325  | 0.387606  | -2.559946 |
| 1 | 4.504722  | 0.336616  | -2.578665 |
| 1 | 4.325255  | 0.104477  | 1.770441  |
| 1 | 2.052175  | -0.295953 | 2.732137  |
| 1 | 1.408823  | 1.247519  | 2.170720  |
| 1 | 7.811378  | -0.360819 | -1.229362 |
| 1 | 6.379985  | -0.664499 | -2.224193 |
| 1 | 6.985937  | 1.001022  | -2.012394 |
| 1 | 1.554607  | -2.180774 | -1.223157 |
| 1 | 0.561676  | -2.116755 | -2.676061 |
| 1 | -0.492146 | -4.260471 | -2.097851 |
| 1 | 1.131787  | -4.522769 | -1.484471 |
| 1 | 0.384062  | -4.359167 | 0.764804  |
| 1 | -1.239988 | -4.506100 | 0.124285  |
| 1 | -1.600935 | -2.285384 | 0.804320  |
| 1 | -1.714719 | -0.323789 | 2.142656  |
| 1 | -0.688596 | 0.898510  | 2.881865  |
| 1 | 0.328194  | -0.780801 | 4.356473  |
| 1 | -1.311896 | -1.399541 | 4.249170  |
| 1 | -0.615971 | -3.206957 | 2.869579  |
| 1 | 1.017672  | -2.802038 | 3.354889  |
| 1 | 1.417717  | -2.144956 | 1.134519  |
| 1 | 1.087421  | 5.127249  | 0.494572  |
| 1 | -0.626061 | 4.694423  | 0.270510  |
| 1 | 0.208592  | 4.192534  | 1.738478  |
| 1 | -6.710277 | 2.270310  | -0.594131 |
| 1 | -7.942448 | 1.201591  | -1.312106 |
| 1 | -6.393499 | 1.472993  | -2.162627 |
| 1 | 7.748509  | 0.691238  | 0.722942  |
| 1 | 6.782905  | -0.604391 | 1.455151  |
| 1 | 6.249486  | 1.096404  | 1.569536  |
| 1 | -6.524487 | -0.633222 | -1.041477 |

**$^2[(^{\text{NMe}_2}\text{PDP})\text{Fe}^{\text{IV}}-\text{OH}(\text{OAc})]^{3+}$  in acetonitrile**

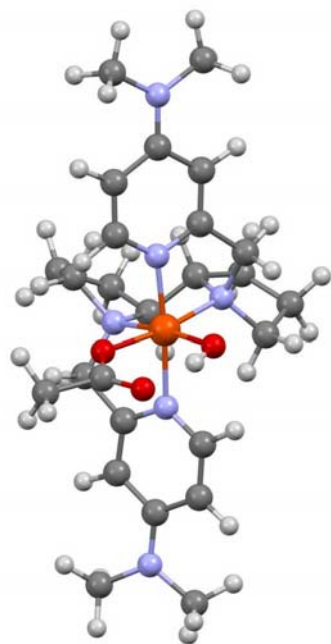

**Energy = -2832.8257336 Ha, G = -2832.233296 Ha**

|    |           |           |           |
|----|-----------|-----------|-----------|
| 26 | -0.085902 | 0.364451  | -0.426025 |
| 7  | -1.995741 | 0.481658  | -0.234195 |
| 6  | -2.675062 | 1.440348  | 0.439799  |
| 6  | -4.041360 | 1.472287  | 0.486425  |
| 6  | -4.808454 | 0.475974  | -0.188443 |
| 6  | -4.065250 | -0.509411 | -0.903853 |
| 6  | -2.697631 | -0.462010 | -0.915762 |
| 6  | -1.834895 | -1.393891 | -1.708772 |
| 6  | -6.881095 | 1.498885  | 0.584329  |
| 7  | -6.149251 | 0.463692  | -0.151336 |
| 7  | 1.943579  | 0.227177  | -0.440143 |
| 6  | 2.699637  | 0.349547  | -1.542732 |
| 6  | 4.078217  | 0.359197  | -1.483322 |
| 6  | 4.704146  | 0.258246  | -0.218892 |
| 6  | 3.889765  | 0.140106  | 0.930657  |
| 6  | 2.516466  | 0.131092  | 0.776136  |
| 6  | 1.556572  | 0.054445  | 1.922750  |
| 6  | 6.936258  | 0.084353  | -1.274585 |
| 7  | -0.517572 | -1.530583 | -1.008488 |
| 6  | 0.478871  | -2.236431 | -1.880977 |
| 6  | 0.100046  | -3.714620 | -1.771822 |
| 6  | -0.416704 | -3.872113 | -0.319392 |
| 6  | -0.654299 | -2.432929 | 0.202629  |
| 7  | 0.257715  | -0.502725 | 1.441683  |
| 6  | -0.790878 | -0.349398 | 2.510370  |
| 6  | -0.497386 | -1.472342 | 3.509197  |
| 6  | 0.083133  | -2.622369 | 2.646318  |
| 6  | 0.363272  | -2.003667 | 1.254994  |
| 7  | 6.072855  | 0.277262  | -0.111259 |
| 8  | -0.072305 | 0.896138  | -2.074303 |
| 8  | 0.165737  | 2.054238  | 0.390265  |
| 6  | 0.449793  | 3.194779  | -0.197190 |
| 6  | 0.702552  | 4.318144  | 0.773129  |
| 8  | 0.503996  | 3.344283  | -1.417281 |
| 6  | -6.902583 | -0.584833 | -0.844654 |
| 6  | 6.743127  | 0.494408  | 1.167967  |
| 1  | -2.073936 | 2.173888  | 0.955567  |
| 1  | -4.510347 | 2.263509  | 1.051487  |

|   |           |           |           |
|---|-----------|-----------|-----------|
| 1 | -4.556375 | -1.297939 | -1.454408 |
| 1 | -2.303967 | -2.366629 | -1.854209 |
| 1 | -1.636232 | -0.952504 | -2.685660 |
| 1 | -7.947082 | 1.324330  | 0.476511  |
| 1 | -6.655591 | 2.492422  | 0.190218  |
| 1 | -6.634781 | 1.472816  | 1.648628  |
| 1 | 2.166528  | 0.444409  | -2.477745 |
| 1 | 4.637226  | 0.484647  | -2.398161 |
| 1 | 4.306721  | 0.018735  | 1.919284  |
| 1 | 1.960937  | -0.538771 | 2.742952  |
| 1 | 1.372307  | 1.064471  | 2.288508  |
| 1 | 7.901883  | -0.275966 | -0.930017 |
| 1 | 6.501011  | -0.629421 | -1.967920 |
| 1 | 7.078007  | 1.050401  | -1.771003 |
| 1 | 1.468670  | -2.066168 | -1.464821 |
| 1 | 0.449867  | -1.815879 | -2.882934 |
| 1 | -0.675143 | -3.969684 | -2.495211 |
| 1 | 0.959850  | -4.350878 | -1.978317 |
| 1 | 0.315290  | -4.381126 | 0.309038  |
| 1 | -1.334900 | -4.455854 | -0.279138 |
| 1 | -1.660357 | -2.302269 | 0.598156  |
| 1 | -1.762464 | -0.491433 | 2.046358  |
| 1 | -0.753084 | 0.657821  | 2.918161  |
| 1 | 0.220629  | -1.146583 | 4.262738  |
| 1 | -1.406599 | -1.765077 | 4.033048  |
| 1 | -0.621176 | -3.449718 | 2.553318  |
| 1 | 0.995542  | -3.028375 | 3.080759  |
| 1 | 1.368342  | -2.232099 | 0.900639  |
| 1 | 0.883461  | 5.246141  | 0.234964  |
| 1 | -0.155260 | 4.432097  | 1.438681  |
| 1 | 1.567987  | 4.072234  | 1.392399  |
| 1 | -6.716926 | -0.555522 | -1.921124 |
| 1 | -7.963850 | -0.429171 | -0.677593 |
| 1 | -6.638025 | -1.573978 | -0.463357 |
| 1 | 7.713434  | 0.945254  | 0.975044  |
| 1 | 6.898086  | -0.476597 | 1.651502  |
| 1 | 6.157517  | 1.143934  | 1.811112  |
| 1 | 0.093229  | 1.889239  | -2.082781 |

**$4[(^{\text{NMe}_2}\text{PDP})\text{Fe}^{\text{IV}}-\text{OH}(\text{OAc})]^{3+}$  in acetonitrile**

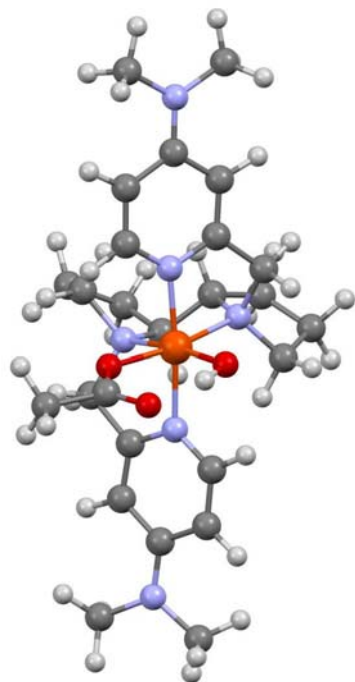

**Energy = -2832.8260538 Ha, G = -2832.234116 Ha**

|    |           |           |           |
|----|-----------|-----------|-----------|
| 26 | -0.082482 | 0.363064  | -0.426691 |
| 7  | -1.992888 | 0.482143  | -0.233930 |
| 6  | -2.671719 | 1.440718  | 0.440726  |
| 6  | -4.037988 | 1.472970  | 0.487895  |
| 6  | -4.805690 | 0.477153  | -0.186953 |
| 6  | -4.062990 | -0.508092 | -0.903064 |
| 6  | -2.695363 | -0.461089 | -0.915601 |
| 6  | -1.833602 | -1.393057 | -1.709522 |
| 6  | -6.877689 | 1.500196  | 0.587261  |
| 7  | -6.146440 | 0.465155  | -0.149235 |
| 7  | 1.941274  | 0.222541  | -0.440188 |
| 6  | 2.698747  | 0.344598  | -1.542882 |
| 6  | 4.076655  | 0.355621  | -1.483050 |
| 6  | 4.703393  | 0.259244  | -0.218074 |
| 6  | 3.887800  | 0.142537  | 0.931464  |
| 6  | 2.515053  | 0.130321  | 0.776688  |
| 6  | 1.555190  | 0.053851  | 1.923254  |
| 6  | 6.935208  | 0.091012  | -1.273600 |
| 7  | -0.516288 | -1.531600 | -1.009569 |
| 6  | 0.479053  | -2.238574 | -1.882336 |
| 6  | 0.098530  | -3.716274 | -1.773015 |
| 6  | -0.416780 | -3.873216 | -0.320051 |
| 6  | -0.654065 | -2.433877 | 0.201670  |
| 7  | 0.256964  | -0.503844 | 1.441474  |
| 6  | -0.792561 | -0.350806 | 2.509301  |
| 6  | -0.499259 | -1.473658 | 3.508287  |
| 6  | 0.081911  | -2.623597 | 2.645726  |
| 6  | 0.362896  | -2.004824 | 1.254640  |
| 7  | 6.070631  | 0.279938  | -0.110059 |
| 8  | -0.069031 | 0.894609  | -2.074318 |
| 8  | 0.165425  | 2.054269  | 0.388771  |
| 6  | 0.448765  | 3.194321  | -0.199721 |
| 6  | 0.700564  | 4.318911  | 0.769294  |
| 8  | 0.503625  | 3.342256  | -1.420097 |
| 6  | -6.900332 | -0.582804 | -0.842829 |
| 6  | 6.740897  | 0.494447  | 1.170009  |
| 1  | -2.070315 | 2.173876  | 0.956651  |

|   |           |           |           |
|---|-----------|-----------|-----------|
| 1 | -4.506436 | 2.264183  | 1.053421  |
| 1 | -4.554511 | -1.296282 | -1.453754 |
| 1 | -2.303482 | -2.365299 | -1.855559 |
| 1 | -1.634715 | -0.951263 | -2.686182 |
| 1 | -7.943762 | 1.325683  | 0.480233  |
| 1 | -6.652455 | 2.493830  | 0.193232  |
| 1 | -6.630564 | 1.473831  | 1.651358  |
| 1 | 2.166360  | 0.437236  | -2.478408 |
| 1 | 4.635356  | 0.477814  | -2.398505 |
| 1 | 4.304287  | 0.024048  | 1.920621  |
| 1 | 1.959497  | -0.539064 | 2.743705  |
| 1 | 1.370258  | 1.063870  | 2.288698  |
| 1 | 7.901126  | -0.268561 | -0.929116 |
| 1 | 6.501916  | -0.622735 | -1.968231 |
| 1 | 7.075598  | 1.057914  | -1.768452 |
| 1 | 1.469135  | -2.069492 | -1.466336 |
| 1 | 0.450253  | -1.818082 | -2.884331 |
| 1 | -0.677729 | -3.970316 | -2.495608 |
| 1 | 0.957362  | -4.353521 | -1.980478 |
| 1 | 0.316013  | -4.381782 | 0.307810  |
| 1 | -1.334816 | -4.457123 | -0.278594 |
| 1 | -1.660338 | -2.302787 | 0.596476  |
| 1 | -1.763743 | -0.493298 | 2.044635  |
| 1 | -0.755389 | 0.656401  | 2.917166  |
| 1 | 0.218309  | -1.147723 | 4.262168  |
| 1 | -1.408695 | -1.766536 | 4.031664  |
| 1 | -0.622277 | -3.450984 | 2.552218  |
| 1 | 0.994089  | -3.029540 | 3.080695  |
| 1 | 1.368201  | -2.233090 | 0.900882  |
| 1 | 0.882161  | 5.246147  | 0.230055  |
| 1 | -0.158127 | 4.433773  | 1.433544  |
| 1 | 1.565171  | 4.073729  | 1.389986  |
| 1 | -6.714959 | -0.553060 | -1.919333 |
| 1 | -7.961496 | -0.426833 | -0.675408 |
| 1 | -6.636022 | -1.572211 | -0.462042 |
| 1 | 7.710502  | 0.947157  | 0.978019  |
| 1 | 6.897015  | -0.477302 | 1.651398  |
| 1 | 6.155056  | 1.142247  | 1.814664  |
| 1 | 0.094555  | 1.888681  | -2.082741 |

### <sup>1</sup>HOAc in acetonitrile

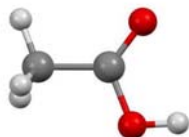

Energy = -229.1559894 Ha, G = -229.121624 Ha

|   |           |           |           |
|---|-----------|-----------|-----------|
| 6 | -6.969421 | -0.009771 | 0.229723  |
| 8 | -7.981246 | 0.878205  | 0.110316  |
| 8 | -6.478887 | -0.569071 | -0.722341 |
| 6 | -6.565187 | -0.190016 | 1.666658  |
| 1 | -5.737136 | -0.891852 | 1.732493  |
| 1 | -8.205046 | 0.957769  | -0.830191 |
| 1 | -7.412688 | -0.562141 | 2.246569  |
| 1 | -6.273789 | 0.770778  | 2.096173  |

### <sup>1</sup>AcO<sup>-</sup> in acetonitrile

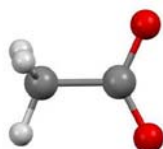

Energy = -228.6759018 Ha, G = -228.654900 Ha

|   |           |           |           |
|---|-----------|-----------|-----------|
| 6 | -7.038196 | 0.052422  | 0.196705  |
| 8 | -8.032268 | 0.811199  | 0.060633  |
| 8 | -6.378240 | -0.511771 | -0.711571 |
| 6 | -6.577058 | -0.188938 | 1.659099  |
| 1 | -5.791941 | -0.945606 | 1.726741  |
| 1 | -7.426225 | -0.491840 | 2.279901  |
| 1 | -6.197673 | 0.747633  | 2.083091  |

### <sup>1</sup>HClO<sub>4</sub> in acetonitrile

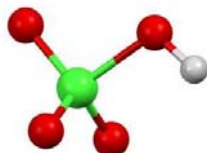

Energy = -761.4109732 Ha, G = -761.413650 Ha

|    |           |           |           |
|----|-----------|-----------|-----------|
| 17 | -7.017913 | -0.350057 | 0.275369  |
| 8  | -8.206141 | 0.848629  | 0.040854  |
| 8  | -7.731850 | -1.251983 | 1.162838  |
| 8  | -6.734968 | -0.892571 | -1.050752 |
| 8  | -5.879695 | 0.332155  | 0.885253  |
| 1  | -7.832833 | 1.519627  | -0.563062 |

### <sup>1</sup>ClO<sub>4</sub><sup>-</sup> in acetonitrile

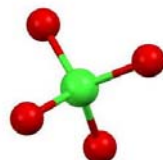

Energy = -761.0016187 Ha, G = -761.014883 Ha

|    |           |           |           |
|----|-----------|-----------|-----------|
| 17 | -7.108149 | -0.299015 | 0.187473  |
| 8  | -8.118184 | 0.721218  | -0.234761 |
| 8  | -7.709626 | -1.198194 | 1.220470  |
| 8  | -6.691777 | -1.109695 | -0.998740 |
| 8  | -5.912964 | 0.391387  | 0.763759  |

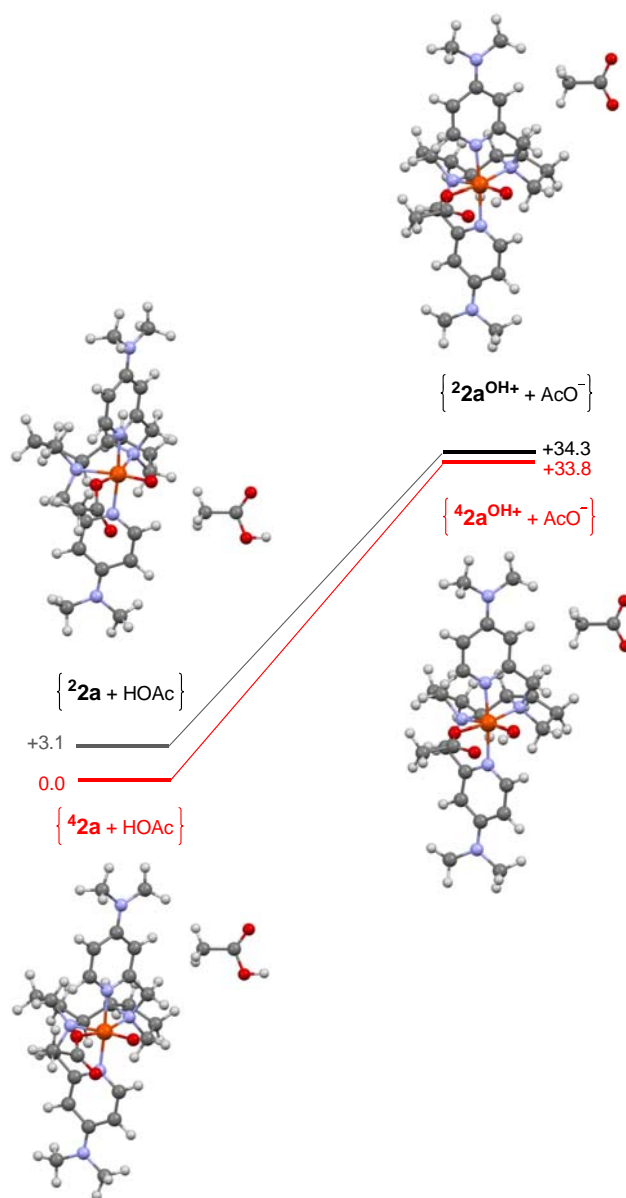

**Figure S1.** Optimized geometries and relative free energies (kcal/mol) of the non-protonated intermediates of the type  $\{2\mathbf{a} + \text{HOAc}\}$  as well as protonated at terminal oxygen  $\{2\mathbf{a}^{\text{NH}^+} + \text{AcO}^-\}$  on the  $S = 3/2$  (red) and the  $S = 1/2$  (black) energy surfaces. C grey, H light grey, N violet, O red, Cl green, Fe orange.



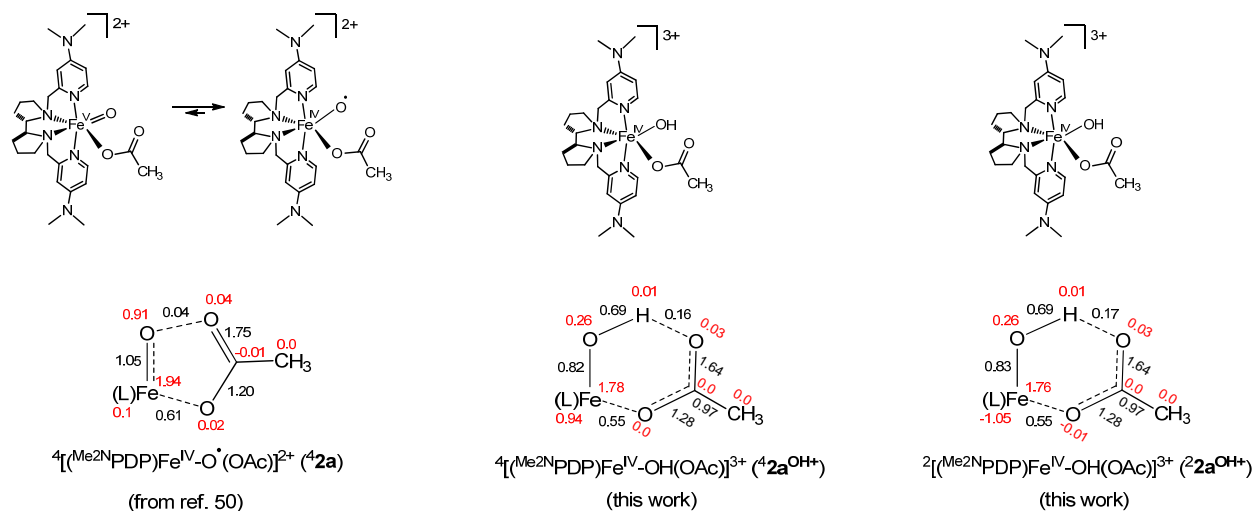

**Figure S2.** Selected computed partial bond orders and spin densities, and formal structural representations for the densities (in numbers of spins) for the intermediates  $4[(\text{NMe}_2\text{PDP})\text{Fe}^{\text{IV}}-\text{OH}(\text{OAc})]^{3+}$  (**42a<sup>OH+</sup>**) and  $2[(\text{NMe}_2\text{PDP})\text{Fe}^{\text{IV}}-\text{OH}(\text{OAc})]^{3+}$  (**22a<sup>OH+</sup>**), compared with those for the parent intermediate  $[(\text{NMe}_2\text{PDP})\text{Fe}^{\text{V}}=\text{O}(\text{OAc})]^{2+}$  (**2a**).<sup>50</sup> Bond orders and spin densities are in black and red, respectively.

## KIE measurements

Cyclohexane (100  $\mu\text{mol}$ ), cyclohexane- $d_{12}$  (100  $\mu\text{mol}$ ), acetic acid (110  $\mu\text{mol}$ ) and, if necessary,  $\text{HClO}_4$  (5  $\mu\text{mol}$ ) were added to the solution of the iron complex in  $\text{CH}_3\text{CN}$  (400  $\mu\text{L}$ ), and the mixture was thermostated at 0  $^\circ\text{C}$ . Then, 100  $\mu\text{L}$  of the oxidant solution in  $\text{CH}_3\text{CN}$  was injected by a syringe pump over 30 min upon stirring. The resulting mixture was stirred for 2.5 h at 0  $^\circ\text{C}$  and the solution was submitted to GC-MS analysis. Kinetic isotope effect was calculated as  $KIE = k_{\text{H}}/k_{\text{D}} = \ln(1-(\text{C}_6\text{H}_{12} \text{ conversion})/100) / \ln(1-(\text{C}_6\text{D}_{12} \text{ conversion})/100)$ .

**Table S1.** Kinetic isotope effects for the oxidations of cyclohexane/ $d_{12}$ -cyclohexane on catalysts **1** and **2** in the absence and in presence of  $\text{HClO}_4$  <sup>a</sup>

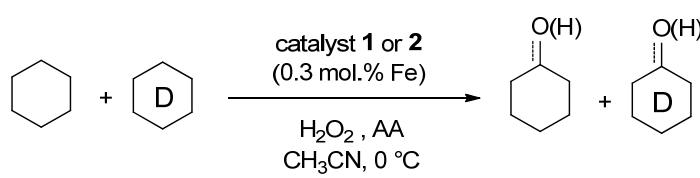

| entry | catalyst | carboxylic acid | strong acid     | $k_{\text{H}}/k_{\text{D}}$ | ref.      |
|-------|----------|-----------------|-----------------|-----------------------------|-----------|
| 1     | <b>1</b> | AA              | –               | 4.0                         | [48]      |
| 2     | <b>1</b> | AA              | $\text{HClO}_4$ | 4.2                         | this work |
| 3     | <b>2</b> | AA              | –               | 1.6                         | this work |
| 4     | <b>2</b> | AA              | $\text{HClO}_4$ | 1.5                         | this work |

<sup>a</sup> At 0  $^\circ\text{C}$ , [catalyst]:[cyclohexane]:[ $d_{12}$ -cyclohexane]:[ $\text{H}_2\text{O}_2$ ]:[acetic acid](:[  $\text{HClO}_4$ ]) = 1  $\mu\text{mol}$  : 100  $\mu\text{mol}$  : 100  $\mu\text{mol}$  : 200  $\mu\text{mol}$  : 110  $\mu\text{mol}$  (: 5  $\mu\text{mol}$ ), oxidant was added by a syringe pump over 30 min, and the mixture was stirred for an additional 2.5 h, followed by GC-MS analysis.

## Supplementary references

- [S1] S. Grimme, J. Antony, S. Ehrlich, H. Krieg. A consistent and accurate ab initio parameterization of density functional dispersion correction (DFT-D) for the 94 elements H-Pu. *J. Chem. Phys.* **2010**, *132*, 154104.
- [S2] M. J. Frisch, G. W. Trucks, H. B. Schlegel, G. E. Scuseria, M. A. Robb, J. R. Cheeseman, G. Scalmani, V. Barone, G. A. Petersson, H. Nakatsuji et al. *Gaussian 16, Revision C.01*; Gaussian, Inc., Wallingford CT, 2019.
- [S3] F. Weigend, R. Ahlrichs. Balanced basis sets of split valence, triple zeta valence and quadruple zeta valence quality for H to Rn: Design and assessment of accuracy. *Phys. Chem. Chem. Phys.* **2005**, *7*, 3297-3305.
- [S4] R. Krishnan, J. S. Binkley, R. Seeger, J. A. Pople. Self-consistent molecular orbital methods. XX. A basis set for correlated wave functions. *J. Chem. Phys.* **1980**, *72*, 650-654.
- [S5] S. Miertuš, E. Scrocco, J. Tomasi. Electrostatic interaction of a solute with a continuum. A direct utilization of ab initio molecular potentials for the prevision of solvent effects. *Chem. Phys.* **1981**, *55*, 117-129.
- [S6] J. L. Pascual-Ahuir, E. Silla, I. Tuñón. GEPOL: An improved description of molecular-surfaces. 3. A new algorithm for the computation of a solvent-excluding surface. *J. Comp. Chem.* **1994**, *15*, 1127-1138.
- [S7] T. A. Manz, N. Gabaldon Limas. Introducing DDEC6 atomic population analysis: part 1. Charge partitioning theory and methodology. *RSC Adv.* **2016**, *6*, 47771-47801.
- [S8] T. A. Manz. Introducing DDEC6 atomic population analysis: part 3. Comprehensive method to compute bond orders. *RSC Adv.* **2017**, *7*, 45552-45581.
